# Supplementary material for: Factors contributing to the sustained implementation of an early childhood obesity prevention intervention: The INFANT Program
Source: Frontiers journal article supplement (doi:10.3389/frhs.2022.1031628), 2022-11-25
Supplement: Data_Sheet_1.PDF [file Data_Sheet_1.PDF]

**Supplementary File1: Mapping of INFANT survey and interview questions to Consolidated Framework for Implementation Research (CFIR) domains**

| Survey questions:                                                                                                                                                                                                                                                                                                                                                                                                                                                                                                                                                                                                                                                                                                                                                                                                                              | Interview questions:                                                                                                                                                                                                                                                                                                                                                                                                                                                                                                                                                                                                                                                                                                                                                                                                                                                                                                                  | Consolidated Framework for Implementation Research (CFIR) – Damschroder et al 2009                                                                                                                                                                                                                                                                                                                                                                                                                                                                                                    |
|------------------------------------------------------------------------------------------------------------------------------------------------------------------------------------------------------------------------------------------------------------------------------------------------------------------------------------------------------------------------------------------------------------------------------------------------------------------------------------------------------------------------------------------------------------------------------------------------------------------------------------------------------------------------------------------------------------------------------------------------------------------------------------------------------------------------------------------------|---------------------------------------------------------------------------------------------------------------------------------------------------------------------------------------------------------------------------------------------------------------------------------------------------------------------------------------------------------------------------------------------------------------------------------------------------------------------------------------------------------------------------------------------------------------------------------------------------------------------------------------------------------------------------------------------------------------------------------------------------------------------------------------------------------------------------------------------------------------------------------------------------------------------------------------|---------------------------------------------------------------------------------------------------------------------------------------------------------------------------------------------------------------------------------------------------------------------------------------------------------------------------------------------------------------------------------------------------------------------------------------------------------------------------------------------------------------------------------------------------------------------------------------|
| <p><b>Why did you attend the INFANT program training?</b><br/>Options: intending to implement; already implementing and training more facilitators; gain additional knowledge about infant feeding; learn about the INFANT program; professional development; other</p> <p><b>Is the INFANT Program currently running in your area?</b><br/>Yes, No - but has been previously, No - never run</p>                                                                                                                                                                                                                                                                                                                                                                                                                                              | <p><b>What did you know about the INFANT program (if anything) before you attended the facilitator training?</b><br/>Prompts: evidence-based, trialled, being run successfully elsewhere...</p> <p><b>What were the reasons why you attended the facilitator training?</b><br/>Prompts: personal PD, identified organisation need....</p> <p><b>How well did the training prepare you to implement IFANT in your area?</b><br/>Prompts: what was most useful, anything not covered; additional support that would have been useful?</p> <p><b>What is/was your role in implementing the INFANT program in your area?</b><br/>Options: program administrator, program coordinator, program facilitator, other</p>                                                                                                                                                                                                                      | <p>Intervention characteristics</p> <ul style="list-style-type: none"> <li>- evidence strength and quality; intervention source relative quality; adaptability; trialability; design quality and packaging; cost; complexity</li> </ul>                                                                                                                                                                                                                                                                                                                                               |
| <p>Yes:<br/><b>In your opinion, why do you think it was decided that the INFANT Program should be implemented in your area?</b> [open ended response]<br/><b>What is your current role in implementing the INFANT program?</b><br/>Options: program administrator, program coordinator, program facilitator, other</p> <p>No-but has been previously:<br/><b>In your opinion, why do you think it was decided that the INFANT Program should no longer be implemented in your area?</b> [open ended response]<br/><b>What was your role in implementing the INFANT program?</b><br/>Options: program administrator, program coordinator, program facilitator, other</p> <p>No-never run:<br/><b>In your opinion, why do you think it was decided that the INFANT Program should not be implemented in your area?</b> [open ended response]</p> | <p><b>After attending the training, what were the reasons that the program was/was not implemented in your area?</b><br/>Prompts: meeting community need; available funding and resources, incentives eg: performance measures, alignment with internal/external policies, regulations or guidelines, management support, program champion; other org priorities; communication...</p> <p><b>How was the decision made that the program would/not be implemented in your organization?</b><br/>Prompts: were staff involved in the decision; how did the staff feel about the decision</p> <p><b>Was the decision influenced by any other organizations implementing the program, and if so, in what ways?</b></p> <p><b>NEVER IMPLEMENTED INTERVIEWS ONLY</b><br/>What do you think would be needed for the INFANT program to be implemented in your area?<br/><b>END OF INTERVIEW QUESTIONS FOR ‘NEVER IMPLEMENTED PROGRAM’</b></p> | <p>Inner setting</p> <ul style="list-style-type: none"> <li>- tension (need) for change; organisational characteristics/compatibility/culture/incentives and rewards; networks and communications; goals and feedback (reporting requirements); relative priority; implementation climate; implementation readiness (leadership engagement; resources; knowledge)</li> </ul> <p>Outer setting</p> <ul style="list-style-type: none"> <li>- meeting client needs; external policies and incentives; peer pressure; cosmopolitanism</li> </ul> <p>Map to relevant CFIR as mentioned</p> |
| <p>Yes / No-but has been previously:<br/><b>In your opinion, which of the following factors enabled the INFANT Program being implemented in your area?</b> (Select as many as apply)</p> <p>No-but has been previously / No-never run<br/><b>In your opinion, which of the following factors contributed to the INFANT Program no longer / not being implemented in your area?</b> (Select as many as apply)</p> <ul style="list-style-type: none"> <li>➤ Availability of funding to implement the Program</li> <li>➤ Evidence to support the decision to implement the Program</li> <li>➤ Availability of staff to deliver Program sessions</li> <li>➤ Confidence of staff to deliver Program sessions</li> <li>➤ Availability of staff to co-ordinate the Program</li> </ul>                                                                 | <p><b>How was the program planned and implemented in your area?</b><br/>Prompts:<br/>What was your role in implementing the INFANT program?<br/>Who was involved in the planning process?<br/>What was considered in the planning process? Eg: resources<br/>How do you recruit and retain participants in the program? Do you advertise the program, where and how?<br/>Who delivers the sessions? Level of confidence?<br/>What format? Age cohort of groups?<br/>Was the program changed in any way to address the needs /preferences/barriers experienced by participants; and in what ways?</p> <p><b>How does the program fit within existing services within your organisation?</b><br/>Prompts:</p>                                                                                                                                                                                                                           | <p>Implementation process – planning, engaging stakeholders, executing, evaluating</p> <p>Characteristics of facilitators – knowledge/beliefs, self-efficacy (confidence), personal attributes, ID with organisation, implementation readiness (stage of change)</p> <p>Intervention characteristics – design quality and packaging; complexity; adaptability; relative advantage</p>                                                                                                                                                                                                 |

|                                                                                                                                                                                                                                                                                                                                                                                                                                                                                                                                                                                                                                                                                                                                                                                                                                                                                                                                            |                                                                                                                                                                                                                                                                                                                                                                                                                                                                                                                                                                                                                                                                                                                                                                                                                                                                                                                                                                                                                                                                                                                                                                                                                                                                                   |                                                                                                                                                    |
|--------------------------------------------------------------------------------------------------------------------------------------------------------------------------------------------------------------------------------------------------------------------------------------------------------------------------------------------------------------------------------------------------------------------------------------------------------------------------------------------------------------------------------------------------------------------------------------------------------------------------------------------------------------------------------------------------------------------------------------------------------------------------------------------------------------------------------------------------------------------------------------------------------------------------------------------|-----------------------------------------------------------------------------------------------------------------------------------------------------------------------------------------------------------------------------------------------------------------------------------------------------------------------------------------------------------------------------------------------------------------------------------------------------------------------------------------------------------------------------------------------------------------------------------------------------------------------------------------------------------------------------------------------------------------------------------------------------------------------------------------------------------------------------------------------------------------------------------------------------------------------------------------------------------------------------------------------------------------------------------------------------------------------------------------------------------------------------------------------------------------------------------------------------------------------------------------------------------------------------------|----------------------------------------------------------------------------------------------------------------------------------------------------|
| <ul style="list-style-type: none"> <li>➤ Management support for the implementation of the Program</li> <li>➤ Alignment of the Program to the priorities of the organisation</li> <li>➤ Ability to incorporate the Program as routine practice within the organisation</li> <li>➤ Ability to recruit parents to the Program</li> <li>➤ Ability to maintain attendance of parents to the Program sessions</li> </ul> <p>Yes / No-but has been previously<br/> <b>Were there any other factors that helped with the implementation of the INFANT Program in your area?</b> [open ended response]</p> <p>No-but has been previously / No-never run<br/> <b>Were there any other factors that contributed to the INFANT Program no longer / never being implemented in your area?</b> [open ended response]</p>                                                                                                                                 | <p>What kinds of changes were needed so that the program could be implemented within your organisation e.g.: changes in scope of practice, to organisational policies or information systems?<br/> Who decided whether changes were needed and what was the process for making these changes? Was there support to make these changes? In retrospect, were there changes you wish had/had not been made?<br/> Is the program integrated as part of routine practice or is it still seen as a departure from current practices; and in what way?<br/> What would you consider to be the key strengths/advantages of implementing the program in your area? Key disadvantages?</p> <p><b>How have you gone about evaluating the program in your organisation?</b><br/> Prompts:<br/> Does your organisation have performance targets/goals related to the implementation of the program? What are they? How are they monitored? Are any feedback reports compiled, and if so, to whom are they disseminated?<br/> Do you think the program has been effective in your community; in what ways; how do you know? (equity and numbers reached; retention rates; parental receptivity; impact – attitude, knowledge behaviour changes; broader community impacts eg: partnerships)</p> | <p>Inner setting – goals and feedback<br/> Outer setting – patient needs and resources<br/> Implementation process – reflecting and evaluating</p> |
| <p>Yes / No-but has been previously<br/> <b>To the best of your knowledge, which of the following options best applies to your area?</b></p> <ul style="list-style-type: none"> <li>• Implementation of the INFANT Program is likely to continue</li> <li>• Implementation of the INFANT Program is NOT likely to continue</li> </ul> <p><b>In your opinion, why do you think your organisation has made this decision?</b> [open ended response]</p> <p>No-but has been previously / No-never run<br/> <b>To the best of your knowledge, which of the following options best applies to your area?</b></p> <ul style="list-style-type: none"> <li>• Implementation of the INFANT Program is likely to occur in the future</li> <li>• Implementation of the INFANT Program is NOT likely to occur in the future</li> </ul> <p><b>In your opinion, why do you think your organisation has made this decision?</b> [open ended response]</p> | <p><b>What are the future plans for the implementation of the INFANT Program in your community?</b><br/> Prompts<br/> Will the program continue to be implemented? Why/not?<br/> Are there changes to the program that are needed so it can continue to be implemented (make it more sustainable)?</p> <p><b>In summary, what key lessons would you share regarding implementing the program?</b><br/> For organisations planning to/currently implementing programs?<br/> For researchers planning/developing future programs?<br/> For policy makers supporting future programs?</p>                                                                                                                                                                                                                                                                                                                                                                                                                                                                                                                                                                                                                                                                                            | <p>Map to relevant CFIR as mentioned</p>                                                                                                           |
